# Supplementary material
Source: MDPI journal article supplement (https://www.mdpi.com/2673-7590/3/2/42)
Supplement: s1 [file s1 › futuretransp-2347469-supplementary.pdf]

## Autonomous RideShare Services Survey

Welcome to the University of Florida & Florida Department of Transportation Autonomous RideShare Services Survey (ARSSS). We are interested in better understanding your experiences with and thoughts on autonomous vehicles, ridesourcing services, and ridesharing services.

As you complete this survey, please refer to this figure and note the following definitions:

**Figure S1.** Description of Transportation Services

|                                                                                                                                                                   |                                                                                                                |                                                                                                                                   |                                                                                                                                                                                                |                                                                                                                                                      |
|-------------------------------------------------------------------------------------------------------------------------------------------------------------------|----------------------------------------------------------------------------------------------------------------|-----------------------------------------------------------------------------------------------------------------------------------|------------------------------------------------------------------------------------------------------------------------------------------------------------------------------------------------|------------------------------------------------------------------------------------------------------------------------------------------------------|
| 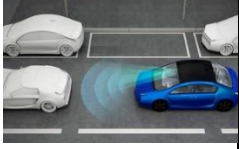                                                                                 | 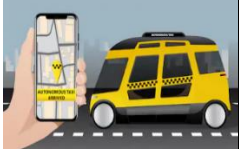                              | 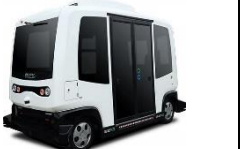                                                 | 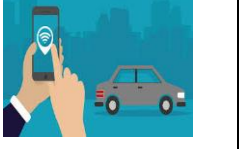                                                                                                             | 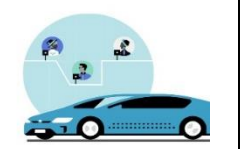                                                                  |
| <p><b>Autonomous Vehicles</b></p> <p>Personally owned vehicles capable of observing the surroundings and driving, in certain situations, without human input.</p> | <p><b>Autonomous taxis</b></p> <p>Self-driving vehicles operated by a commercial company for personal use.</p> | <p><b>Autonomous Shuttles</b></p> <p>Self-driving vehicles operated by a commercial company with a capacity of 12 passengers.</p> | <p><b>Ridesourcing services</b></p> <p>Services that use smartphone apps to connect passengers with drivers who use their own car. For example, Uber, Lyft, or other ridehailing services.</p> | <p><b>Ridesharing services</b></p> <p>For example, traditional carpools or <b>sharing</b> a ride with other users through ridesourcing services.</p> |

Note: You may tear this sheet from your survey packet.

- An **autonomous/self-driving vehicle** is capable of observing the surroundings and driving, in certain situations, without human input. Currently, it can perform many driving tasks on many roads, under most conditions, without a driver.
- **Paratransit services** are door-to-door services for people with disabilities.
- **Community transportation** is a traditional transportation service in the community where you live (for example, a community van or shuttle).

## Demographics

*First, please tell us a little bit about yourself:*

1. What is your current gender identity?
  - ☐ Male
  - ☐ Female
  - ☐ Other \_\_\_\_\_
2. Please indicate your age: \_\_\_\_\_
  - ☐ Prefer not to answer
3. Please indicate your race/ethnicity (Select all that apply):
  - ☐ American Indian or Alaska Native
  - ☐ Asian
  - ☐ Black or African American
  - ☐ Hispanic or Latino
  - ☐ Native Hawaiian or Other Pacific Islander
  - ☐ White
  - ☐ Other \_\_\_\_\_
4. What is the highest degree or level of school you have completed?
  - ☐ Less than 9th grade
  - ☐ 9th to 12th grade, no diploma
  - ☐ High school graduate or GED
  - ☐ Some college, no degree
  - ☐ Associate's degree
  - ☐ Bachelor's degree
  - ☐ Master's degree
  - ☐ Doctoral degree
  - ☐ Prefer not to answer
5. What is your current employment situation? (Please select all that apply.)
  - ☐ Work Part-time
  - ☐ Work Full-time
  - ☐ Not employed
  - ☐ Retired
  - ☐ Military Veteran
  - ☐ Full-time Student
  - ☐ Disabled/ not able to work
  - ☐ Other \_\_\_\_\_

**6.** What is your annual household income?

- ☐ Under \$25,000
- ☐ \$25,000 - \$49,999
- ☐ \$50,000 - \$74,999
- ☐ \$75,000 - \$99,999
- ☐ \$100,000 - \$149,999
- ☐ \$150,000 or more
- ☐ Prefer not to answer

**7.** Do you have any impairments that impact your use of transportation? If so, please select all that apply:

- ☐ Physical (for example, unable to turn neck or maintain pressure on the brake or gas pedal)
- ☐ Vision (for example, difficulty driving at night)
- ☐ Hearing (for example, deafness)
- ☐ Cognitive (for example, difficulty paying attention while driving)
- ☐ Psychological (for example, anxiety in heavy traffic)
- ☐ None of these
- ☐ Prefer not to answer

**8.** Do you have a Smartphone (i.e., a mobile phone that performs many of the functions of a computer)?

- ☐ Yes
- ☐ No
- ☐ Not sure

**9.** Do you own a working motor vehicle, such as a car, truck, or motorcycle?

- ☐ Yes
- ☐ No

**10.** Do you have a valid driver's license?

- ☐ Yes
- ☐ No

## Modes of Transportation

Next, we have some questions about your experiences with various types of transportation. Please refer to Figure 1 on page 1 for a definition of transportation options.

### 11. How familiar are you with the following types of transportation?

Select level of familiarity for each mode of transportation:

|                       | Not familiar             | Slightly familiar        | Somewhat familiar        | Moderately familiar      | Extremely familiar       |
|-----------------------|--------------------------|--------------------------|--------------------------|--------------------------|--------------------------|
| Autonomous vehicles   | <input type="checkbox"/> |
| Autonomous taxis      | <input type="checkbox"/> |
| Autonomous shuttles   | <input type="checkbox"/> |
| Ridesourcing services | <input type="checkbox"/> |
| Ridesharing services  | <input type="checkbox"/> |

### 12. How often have you used the following modes of transportation?

Provide response for each mode of transportation:

|                                                                                                                                                                    | Often                    | Rarely                   | Never                    |
|--------------------------------------------------------------------------------------------------------------------------------------------------------------------|--------------------------|--------------------------|--------------------------|
| Autonomous vehicle                                                                                                                                                 | <input type="checkbox"/> | <input type="checkbox"/> | <input type="checkbox"/> |
| Autonomous taxi                                                                                                                                                    | <input type="checkbox"/> | <input type="checkbox"/> | <input type="checkbox"/> |
| Autonomous shuttle                                                                                                                                                 | <input type="checkbox"/> | <input type="checkbox"/> | <input type="checkbox"/> |
| Ridesourcing service (Uber, Lyft, Taxi)                                                                                                                            | <input type="checkbox"/> | <input type="checkbox"/> | <input type="checkbox"/> |
| Ridesharing service (carpool, etc.)                                                                                                                                | <input type="checkbox"/> | <input type="checkbox"/> | <input type="checkbox"/> |
| Autonomous ridesharing service                                                                                                                                     | <input type="checkbox"/> | <input type="checkbox"/> | <input type="checkbox"/> |
| A traditional vehicle with active safety systems or driver-assistance systems (for example: adaptive cruise control, lane departure warning, parking assist, etc.) | <input type="checkbox"/> | <input type="checkbox"/> | <input type="checkbox"/> |

**13.** Which modes of transportation are **available** to you? Select all that apply:

- ☐ Drive myself
- ☐ Share a ride with family
- ☐ Share a ride with friends
- ☐ Walking
- ☐ Bicycling
- ☐ Public transit
- ☐ Golf cart
- ☐ Ridesourcing
- ☐ Paratransit
- ☐ Ridesharing
- ☐ Community transportation service in the community where I live
- ☐ Autonomous vehicle
- ☐ Other \_\_\_\_\_

**14.** In the last three months, how have you traveled to each of the following destinations? For each destination, please indicate your primary mode of travel (noted across the top row of the table below):

| Destination                       | Drove yourself        | Rode with family      | Rode with friends     | Walked                | Biked                 | Public transit        | Golf cart             | Ridesourcing          | Paratransit           | Ridesharing           | Community transportation | Autonomous vehicle    | Other                 | Not applicable        |
|-----------------------------------|-----------------------|-----------------------|-----------------------|-----------------------|-----------------------|-----------------------|-----------------------|-----------------------|-----------------------|-----------------------|--------------------------|-----------------------|-----------------------|-----------------------|
| Work                              | <input type="radio"/>    | <input type="radio"/> | <input type="radio"/> | <input type="radio"/> |
| Volunteering                      | <input type="radio"/>    | <input type="radio"/> | <input type="radio"/> | <input type="radio"/> |
| Shopping, running errands, etc.   | <input type="radio"/>    | <input type="radio"/> | <input type="radio"/> | <input type="radio"/> |
| Medical appointments, etc.        | <input type="radio"/>    | <input type="radio"/> | <input type="radio"/> | <input type="radio"/> |
| Physical activity, exercise, etc. | <input type="radio"/>    | <input type="radio"/> | <input type="radio"/> | <input type="radio"/> |
| Social Activities                 | <input type="radio"/>    | <input type="radio"/> | <input type="radio"/> | <input type="radio"/> |
| Dining out                        | <input type="radio"/>    | <input type="radio"/> | <input type="radio"/> | <input type="radio"/> |

**15.** In a typical week, what is your primary means of travel?

- ☐ Drive myself
- ☐ Share a ride with family
- ☐ Share a ride with friends
- ☐ Walking
- ☐ Bicycling
- ☐ Public transit
- ☐ Golf cart
- ☐ Ridesourcing
- ☐ Paratransit
- ☐ Ridesharing
- ☐ Community transportation service in the community where I live
- ☐ Autonomous vehicle
- ☐ Other \_\_\_\_\_

**16.** Why is this your preferred mode of transportation? Select all that apply:

- ☐ I don't have access to public transportation in my area
- ☐ The public transportation isn't good enough
- ☐ Access to ridesourcing services is limited in my area
- ☐ I prefer to be independent
- ☐ It is more comfortable
- ☐ It is more relaxing
- ☐ It is more enjoyable
- ☐ I need it for long-distance travel
- ☐ I need it for transporting equipment
- ☐ I need it to drive my family members
- ☐ I prefer the privacy
- ☐ I can control my own schedule
- ☐ It is faster
- ☐ It is safer
- ☐ It is cheaper
- ☐ I am not interested in reducing my car use
- ☐ Other \_\_\_\_\_

**16A.** If you selected multiple reasons for Item 16, **which of these reasons is the single most important factor?**

- ☐ I don't have access to public transportation in my area
- ☐ The public transportation isn't good enough
- ☐ Access to ridesourcing services is limited in my area
- ☐ I prefer to be independent
- ☐ It is more comfortable
- ☐ It is more relaxing
- ☐ It is more enjoyable
- ☐ I need it for long-distance travel
- ☐ I need it for transporting equipment
- ☐ I need it to drive my family members
- ☐ I prefer the privacy
- ☐ I can control my own schedule
- ☐ It is faster
- ☐ It is safer
- ☐ It is cheaper
- ☐ I am not interested in reducing my car use
- ☐ Other \_\_\_\_\_

**17.** Which of the following issues impact your choices about various types of transportation?

Please select all that apply:

- ☐ Do not own a working vehicle
- ☐ Do not have a valid driver's license
- ☐ Can't drive due to medical condition
- ☐ Can't drive due to physical condition
- ☐ Prefer not to drive at night
- ☐ Prefer not to drive in heavy traffic
- ☐ Need assistance getting in and out of vehicle
- ☐ Require a wheelchair lift
- ☐ Require a ramp
- ☐ Require space for an assistive device (e.g., walker, wheelchair, etc.)
- ☐ Public transportation service is limited
- ☐ Do not feel safe using public transportation
- ☐ Do not feel safe using a hired service (taxi, Uber, Lyft, etc.)
- ☐ Do not know how to use a hired service (taxi, Uber, Lyft, etc.)
- ☐ Do not have the means to use a hired service (taxi, Uber, Lyft, etc.)
- ☐ Other issue (please describe):
- ☐ None of these
- ☐ Not sure

**18.** In the last 3 months, have you driven a motor vehicle (such as an automobile, van, or motorcycle)?

- ☐ Yes
- ☐ No (If selected, skip to #19)

**18A.** On average, how many hours do you spend per week driving to and from work?

- ☐ \_\_\_\_\_
- ☐ Not applicable, I do not work
- ☐ Not applicable, I work remotely
- ☐ Not sure

**18B.** On average, how many hours do you spend per week driving for trips other than work? [If none, please enter "0"]

- ☐ \_\_\_\_\_
- ☐ Not sure

**19.** Have you ever requested a ride from ridesourcing services (for example Uber, Lyft, etc.)?

- ☐ Yes
- ☐ No (If selected, skip to 20)

**19A.** On average, how many times per week do you use ridesourcing services?

- ☐ \_\_\_\_\_
- ☐ 1 to 3 times per month
- ☐ Less than once per month
- ☐ Not sure

### **Perceptions of Transportation Options**

*Next, we have some questions about your transportation options and perceptions of autonomous vehicles, ridesourcing services, and ridesharing services.*

*As you complete this section, please refer to Figure 1 (on page 1) for definitions:*

Directions: *Please place a vertical dash ( / ) on the scale to display the degree to which you agree or disagree with the statement.*

**20.** I would use an autonomous/self-driving vehicle

Strongly Disagree    \_\_\_\_\_    Strongly Agree

**21.** I will use an autonomous vehicle ridesharing service if it is handicap accessible

Strongly Disagree    \_\_\_\_\_    Strongly Agree

**22.** Riding in an autonomous vehicle is safe

Strongly Disagree    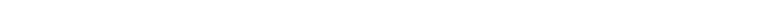    Strongly Agree

**23.** Driving my vehicle near autonomous vehicles is safe

Strongly Disagree    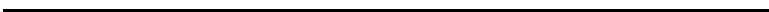    Strongly Agree

**24.** Autonomous vehicles will decrease the number of crashes

Strongly Disagree    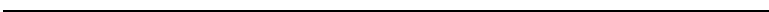    Strongly Agree

**25.** Autonomous vehicles will reduce the severity of injuries in crashes

Strongly Disagree        Strongly Agree

**26.** I would encourage family members to use autonomous vehicles

Strongly Disagree        Strongly Agree

**27.** I trust the technology in an autonomous vehicle more than I trust the technology of a standard vehicle.

Strongly Disagree    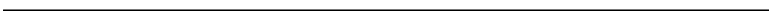    Strongly Agree

**28.** I trust a driver in an autonomous vehicle more than I trust a driver of a standard vehicle

Strongly Disagree    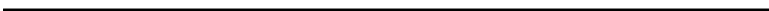    Strongly Agree

**29.** I would use an autonomous shuttle

Strongly Disagree    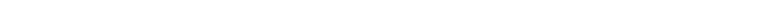    Strongly Agree

**30.** I would rideshare with people that I don't know, if it reduces my costs

Strongly Disagree        Strongly Agree

**31.** I would encourage family members to use ridesourcing services

Strongly Disagree        Strongly Agree

**32.** I am willing to use a ridesharing autonomous vehicle

Strongly Disagree        Strongly Agree

**33.** Under which of the following conditions are you willing to use an autonomous vehicle?

Select all that apply:

- ☐ If there is an operator in the driver's seat monitoring vehicle operations
- ☐ If there is an operator in the vehicle who can answer my questions
- ☐ If the vehicle is remotely monitored by an operator
- ☐ If I can communicate with an operator that is working remotely
- ☐ None of the above

**34.** Which of the following types of autonomous vehicles would you use? Select all that apply:

- ☐ Privately owned autonomous vehicle
- ☐ Shared-ownership autonomous vehicle
- ☐ A public autonomous vehicle (for example, autonomous shuttle)
- ☐ A ridesharing autonomous vehicle
- ☐ None of the above
- ☐ Not sure
- ☐ Prefer not to answer

**35.** Autonomous vehicles will allow me to stay active

Strongly Disagree      \_\_\_\_\_      Strongly Agree

**36.** Autonomous vehicles will enhance my quality of life

Strongly Disagree      \_\_\_\_\_      Strongly Agree

**37.** Autonomous vehicles will reduce traffic congestion

Strongly Disagree      \_\_\_\_\_      Strongly Agree

**38.** I would not mind having a longer travel time if I can engage in other tasks (for example, watching a video or reading a book) while riding in an autonomous vehicle.

Strongly Disagree      \_\_\_\_\_      Strongly Agree

**39.** I would be willing to pay more than the price of a traditional vehicle to purchase a fully self-driving autonomous vehicle

Strongly Disagree      \_\_\_\_\_      Strongly Agree

**39A.** What percentage of money would you be willing to pay (as a one-time cost), beyond the typical purchase price of a traditional vehicle, to purchase a fully self-driving autonomous vehicle?

- ☐ \_\_\_\_\_ %  
☐ Not sure

**40.** I would be willing to pay more than the standard price of a traditional transportation services (like a shuttle, bus, or taxi) to ride in a fully self-driving autonomous vehicle

Strongly Disagree \_\_\_\_\_ Strongly Agree

IF AGREE:

**40A.** How much more would you be willing to pay per mile for the use of a public autonomous vehicle?

- ☐ \_\_\_\_\_  
☐ Not sure

**41.** Autonomous vehicles are designed for people like me

Strongly Disagree \_\_\_\_\_ Strongly Agree

**42.** Autonomous vehicles will provide more travel options in areas with insufficient transit services

Strongly Disagree \_\_\_\_\_ Strongly Agree

**43.** Autonomous **vehicles** will be easy to use

Strongly Disagree \_\_\_\_\_ Strongly Agree

**44.** Autonomous vehicles will increase mobility for those who are currently incapable of driving

Strongly Disagree \_\_\_\_\_ Strongly Agree

**45.** Shared use of autonomous vehicles will provide better access to transportation for those that currently have barriers to transportation

Strongly Disagree \_\_\_\_\_ Strongly Agree

**46.** Autonomous ridesharing services will be easy for individuals with physical limitations to use

Strongly Disagree \_\_\_\_\_ Strongly Agree

**47.** Autonomous ridesourcing services will be easy for individuals with physical limitations to use

Strongly Disagree 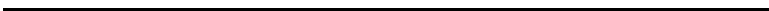 Strongly Agree

**48.** Autonomous **shuttles** will be easy to use

Strongly Disagree 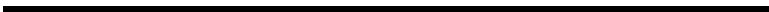 Strongly Agree

**49.** I am concerned about the following issues related to autonomous vehicles:

(Select all that apply)

- ☐ Autonomous vehicles do not drive as well as human drivers
- ☐ Legal liability in case of a crash
- ☐ Data privacy (e.g., location, destination tracking)
- ☐ Interactions with other road users
- ☐ Sensor equipment failure
- ☐ Computer system failure
- ☐ None of the above
- ☐ Other \_\_\_\_\_
- ☐ Not sure
- ☐ Prefer not to answer

*Finally, we'd like you to share your thoughts with us about autonomous vehicles.*

**50.** Are there any other comments or thoughts you'd like to share about autonomous vehicles or any other topic addressed in this survey?
